# Supplementary material
Source: PubMed Central journal article supplement (PMC6855117)
Supplement: baADV2019000682-suppl1.pdf [file baADV2019000682-suppl1.pdf]

## **Supplemental information**

### **Appendices: Risk of bias assessment protocol**

#### **SELECTION BIAS**

Q1 Are the inclusion/exclusion criteria the same for all study participants (or groups)?  
**Yes/No/Unclear**

Q2 Is the recruitment strategy the same for all study participants (or groups)?  
**Yes/No/Unclear**

Q3 If a comparison or control group is used, is the selection of this group appropriate after considering feasibility and ethical considerations?  
**Yes/No/Unclear/  
Not applicable**

#### **PERFORMANCE BIAS**

Q4 Does the execution of the study account for any important variations from the study protocol? (If no study protocol was available, please answer “UNCLEAR”)  
**Yes/No/Unclear**

Q5 Were the investigators blinded to the outcome (relapse, infections, GvHD)?  
**Yes/No/Unclear**

#### **DETECTION BIAS**

Q6 Were clinicians or assessors recording clinical outcomes (relapse, infections, GvHD) blinded to patients' blood and graft composition?  
**Yes/No/Unclear/  
Not applicable**

Q7 (a) Were consistent outcome measures (i.e. defined criteria for aGVHD) used across all study participants?  
**Yes/No/Unclear/  
Not applicable**

Q7 (b) Were consistent outcome measures (i.e. defined criteria for relapse) used across all study participants?  
**Yes/No/Unclear/  
Not applicable**

Q7 (c) Were consistent outcome measures (i.e. defined criteria for infections) used across all study participants?  
**Yes/No/Unclear/  
Not applicable**

Q7 (d) Were baseline characteristics adequately reported for all study participants (or groups)?  
**Yes/No/Unclear**

#### **ATTRITION BIAS**

Q8 Was the length of follow-up the same for all study participants (or groups), or if not, was duration of follow-up adjusted by statistical methods (e.g. survival analysis)?  
**Yes/No/Unclear**

#### **REPORTING BIAS**

Q9 (a) Does the study report aGVHD as an outcome?  
**Yes/No**

- Q9 (b) Does the study report relapse as an outcome?  
**Yes/No**
- Q9 (c) Does the study report infections as an outcome?  
**Yes/No**
- Q9 (d) Does the study report overall survival?  
**Yes/No**
- Q9 (e) Does the study report disease-free survival?  
**Yes/No**

### **CONFOUNDING**

- Q10 (a) Was stratification of participants for  $\gamma\delta$  T-cells analysis appropriately balanced (e.g. using median or mean value)? [if an arbitrary threshold for stratification without justification was used, please answer NO]  
**Yes/No/Unclear/  
Not applicable**
- Q10 (b) If a control group was used, were groups appropriately matched by baseline characteristics?  
**Yes/No/Unclear/  
Not applicable**
- Q11 (a) Were multiple outcomes treated as competing risks?  
**Yes/No/Unclear**
- Q11 (b) Was multivariate analysis performed to take potential confounding factors into account?  
**Yes/No/Unclear**

### **OVERALL ASSESSMENT**

- Q12 (a) Was the study free from any conflicts of interest (including commercial funding)?  
**Yes/No/Unclear**
- Q12 (b) Do you consider the results of the study to be believable taking any study limitations into consideration?  
**Yes/No/Unclear**

**Table S1: Risk of bias and confounding evaluation**

| Study        | Q1 (S) | Q2 (S) | Q3 (S) | Q4 (P) | Q5 (P) | Q6 (D) | Q7a (D) | Q7b (D) | Q7c (D) | Q7d (D) | Q8 (A) | Q9a (R) | Q9b (R) | Q9c (R) | Q9d (R) | Q9e (R) | Q10a (C) | Q10b (C) | Q11a (C) | Q11b (C) | Q12a (O) | Q12b (O) |
|--------------|--------|--------|--------|--------|--------|--------|---------|---------|---------|---------|--------|---------|---------|---------|---------|---------|----------|----------|----------|----------|----------|----------|
| Lamb 1996    | +      | +      | .      | +      | -      | +      | +       | +       | .       | -       | +      | +       | +       | .       | +       | +       | +        | .        | ?        | -        | +        | +        |
| Lamb 1999    | +      | +      | .      | +      | -      | +      | .       | +       | .       | +       | +      | .       | +       | .       | .       | +       | +        | .        | +        | -        | +        | +        |
| Godder 2007  | +      | +      | .      | +      | -      | +      | +       | +       | +       | +       | +      | +       | +       | +       | +       | +       | +        | .        | +        | +        | +        | +        |
| Perko 2015   | +      | +      | .      | +      | -      | +      | +       | +       | .       | +       | +      | +       | +       | .       | +       | +       | +        | .        | +        | +        | +        | +        |
| Ho 2017      | +      | ?      | .      | +      | -      | +      | .       | +       | +       | +       | +      | .       | +       | +       | +       | .       | ?        | .        | +        | +        | +        | ?        |
| Park 2018    | +      | +      | .      | +      | -      | +      | .       | +       | +       | ?       | +      | .       | +       | +       | +       | .       | +        | .        | +        | -        | +        | +        |
| Liu 2018     | +      | +      | .      | +      | -      | +      | .       | .       | +       | ?       | +      | .       | .       | +       | .       | .       | +        | .        | ?        | -        | +        | +        |
| Bian 2018    | +      | +      | .      | +      | -      | +      | +       | .       | +       | +       | +      | +       | .       | +       | .       | .       | +        | .        | -        | -        | +        | +        |
| Pabst 2007   | +      | ?      | .      | +      | -      | +      | +       | .       | .       | -       | +      | +       | .       | .       | .       | .       | +        | .        | +        | +        | +        | +        |
| Xuan 2018    | +      | +      | .      | +      | -      | +      | +       | .       | .       | +       | +      | +       | .       | .       | .       | .       | +        | .        | -        | +        | +        | +        |
| Gaballa 2019 | +      | +      | .      | +      | -      | +      | +       | +       | +       | +       | +      | +       | +       | +       | .       | .       | +        | .        | +        | +        | +        | +        |

S = selection bias, P = performance bias, D = detection bias, A = attrition bias, R = reporting bias, C = risk of confounding, O = overall assessment of bias.  
 (+) low risk of bias or confounding, (-) high risk of bias or confounding, (?) unclear risk of bias or confounding, (·) not applicable to study.

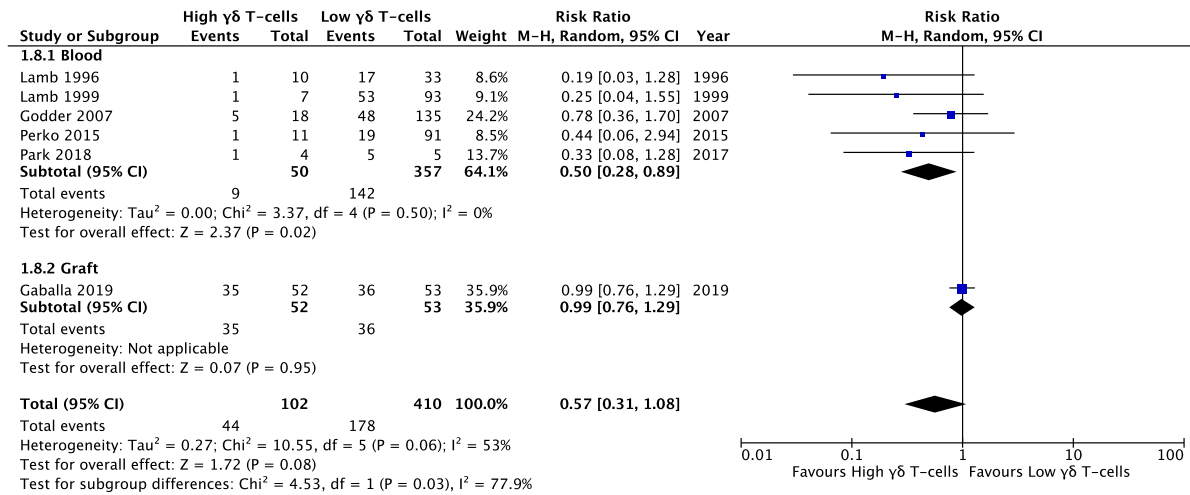

**Figure S1. Forest plot of relapse data (Allo-HSCT only).** Plot shows meta-analysis result of allo-HSCT studies reporting number of relapses. Subgroup analysis according to the sample origin is also shown. Blue squares indicate the relative weight of each study in the meta-analysis and horizontal lines represent the 95%-CI for the effect size. Bigger squares show studies with higher relative weights. Weights are from random-effects analysis and are based on the size of the study and the number of events. Black diamonds represent the total effect size. M-H= Mantel-Haenszel.

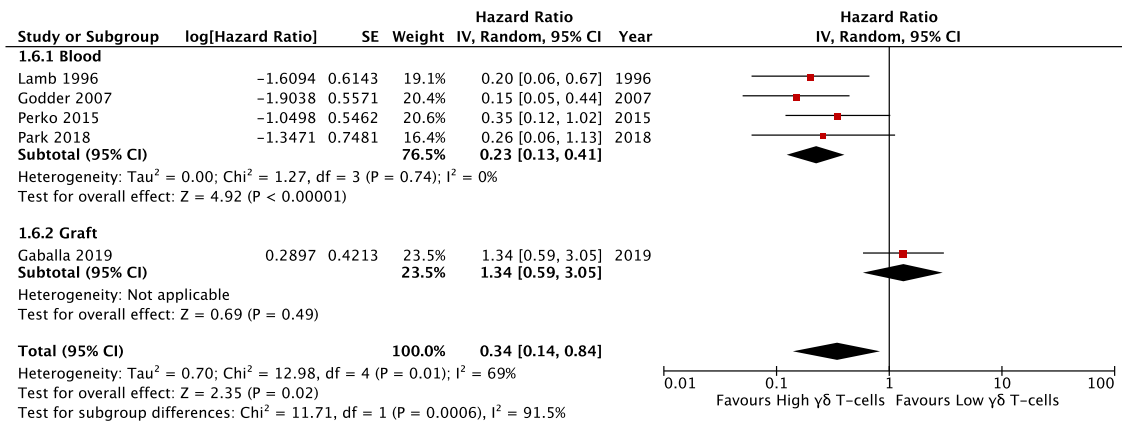

**Figure S2. Forest plot of OS data (Allo-HSCT only).** Plot shows meta-analysis result of allo-HSCT studies reporting OS. Subgroup analysis according to the sample origin is also shown. Red squares indicate the relative weight of each study in the meta-analysis and horizontal lines represent the 95%-CI for the effect size. Bigger squares show studies with higher relative weights. Weights are from random-effects analysis and are based on the size of the study and the number of events. Black diamonds represent the total effect size. IV= Inverse variance.
